# Supplementary material for: Accelerated discovery of 3D printing materials using data-driven multiobjective optimization
Source: PubMed Central journal article supplement — Sci Adv. 2021 Oct 15;7(42):eabf7435. doi: 10.1126/sciadv.abf7435 (PMC8519564; doi:10.1126/sciadv.abf7435), 2021-10-15
Supplement: sciadv.abf7435_sm.pdf [file sciadv.abf7435_sm.pdf]

## Supplementary Materials for

### **Accelerated discovery of 3D printing materials using data-driven multiobjective optimization**

Timothy Erps, Michael Foshey\*, Mina Konaković Luković, Wan Shou\*, Hanns Hagen Goetzke, Herve Dietsch, Klaus Stoll, Bernhard von Vacano, Wojciech Matusik

\*Corresponding author. Email: mfoshey@mit.edu (M.F.); wanshou@mit.edu (W.S.)

Published 15 October 2021, *Sci. Adv.* 7, eabf7435 (2021)

DOI: 10.1126/sciadv.abf7435

#### **This PDF file includes:**

Supplementary Text

Figs. S1 to S7

Tables S1 to S4

## **Supplementary Text**

### **Stopping Criteria Considerations**

Many different stopping criteria can be used when deciding when to stop the optimization process. The optimization process stopping criteria could be reached once the performance improvement has not exceeded a given threshold over several consecutive iterations. Another method is a fixed amount of time or cost that can be spent in total for experimentation. The time or cost limit is often the constraining factor in many different applications. As shown in this work, a stopping criterion could also be given with a fixed budget in the number of experiments, driven by time or other resource limitations. We decided to do a fixed number of iterations (30) since the fixed budget is the most commonly used criterion in practice.

### **Batching Experiments in Parallel**

Batching the number of experiments conducted at once reduces the total amount of time needed for experimentation. However, if the total number of experiments is limited with a fixed budget, having less iterations with larger batch size could decrease the algorithm's ability to accurately predict potentially high-performing designs due to the surrogate model being updated less over the entire optimization process. In circumstances like ours, physical constraints limit the total number of samples it was feasible to produce at once. When selecting the number of experiments that can be batched together, these trade-offs and constraints must be considered.

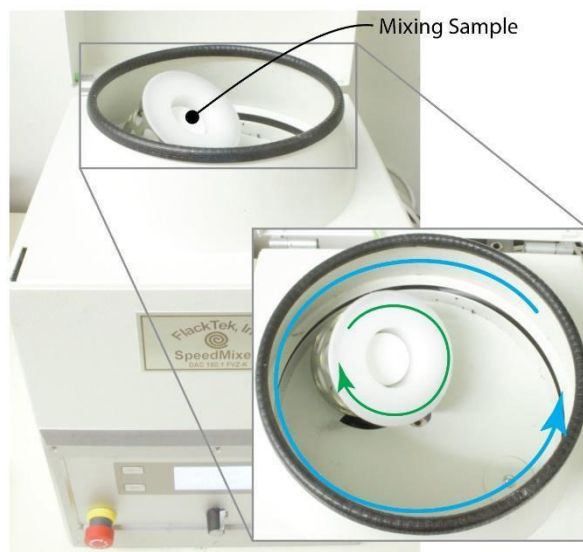

**Fig. S1.**  
**Formulation mixer.** Dual asymmetric centrifuge mixer utilized for sample fabrication pipeline. The arrows depict the rotation of the sample during operation. (Photo Credit: Michael Foshey, Massachusetts Institute of Technology)

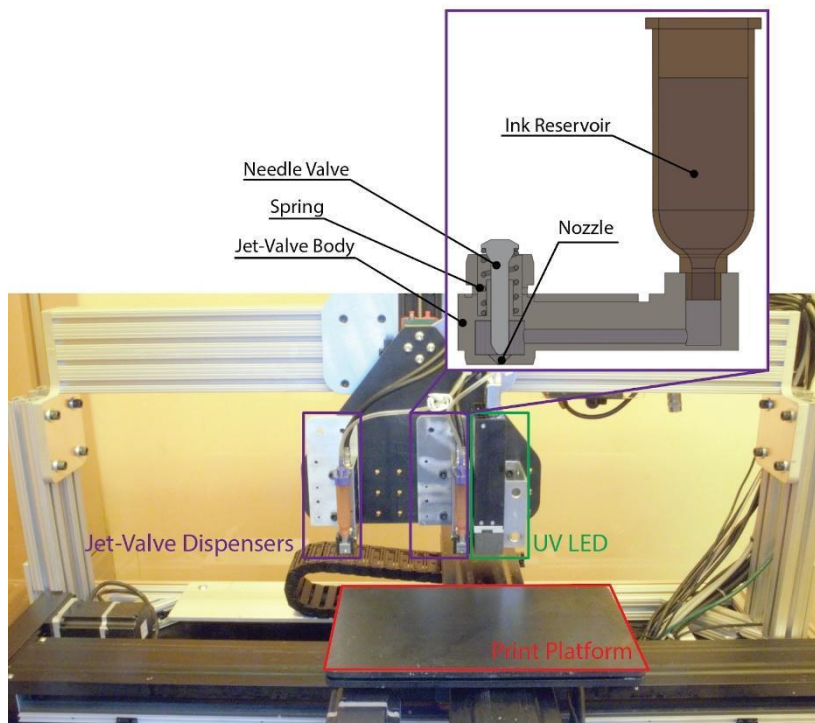

**Fig. S2.**

**Jet-valve 3D printer utilized in the sample fabrication pipeline.** Circled in purple are the 2 jet-valve dispensers used for dispensing the material in parallel. Circled in green is the UV LED used for curing the dispensed material. Circled in red is the print platform, the area where the samples are dispensed onto and cured. (Photo Credit: Michael Foshey, Massachusetts Institute of Technology)

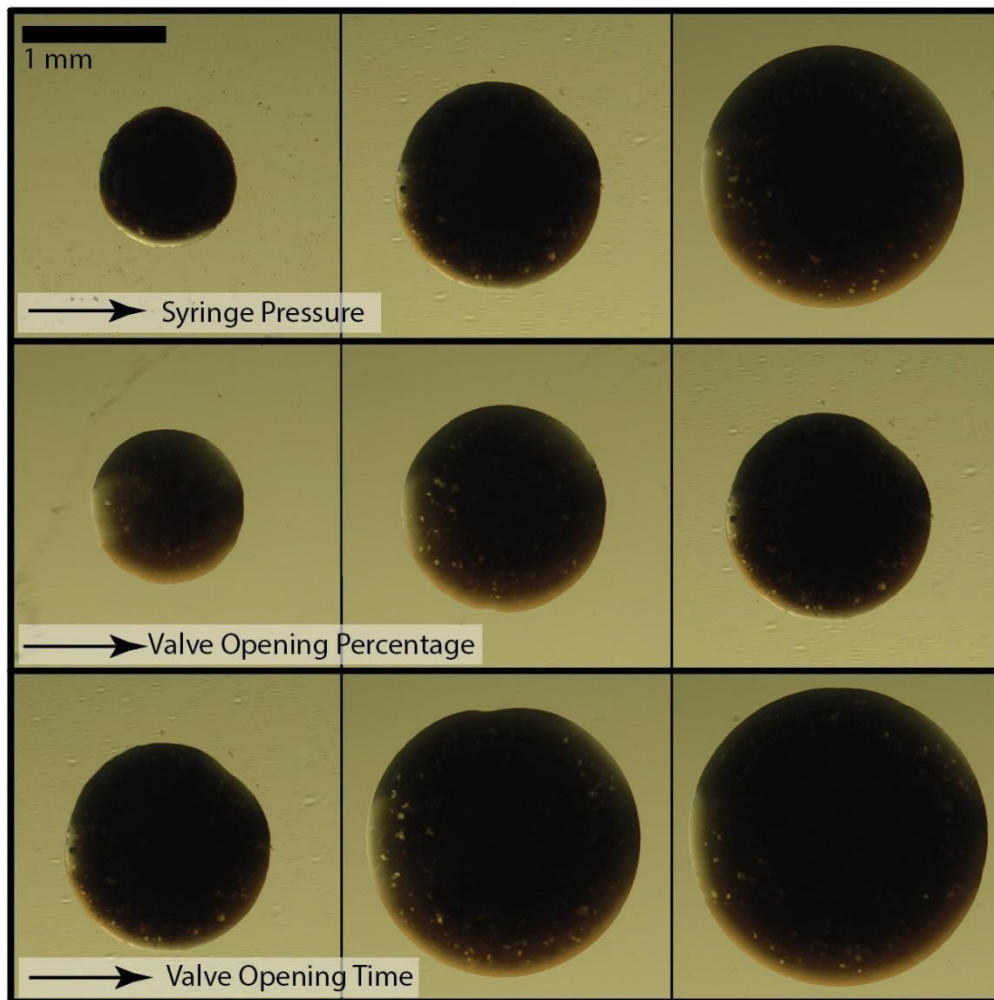

**Fig. S3.**

**Optical microscopy images of jet-valve dispensing droplets.** Droplet variations in Syringe pressure (top) (parameters from left to right: 15 psi, 35 psi, 50 psi, all 90 % opening percentage and 1 ms opening time), valve opening pressure (middle) (parameters from left to right: 70 %, 80 %, 90 %, all 35 psi syringe pressure and 1 ms opening time), and valve opening time (bottom) (parameters from left to right: 1 ms, 1.5 ms, 2 ms, all 35 psi syringe pressure and 90 % opening percentage).

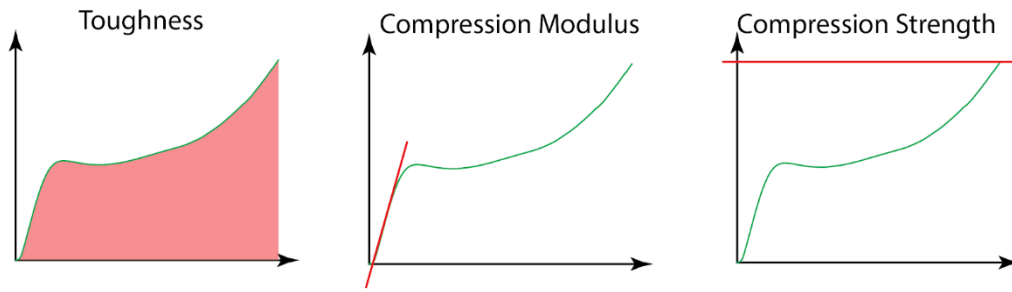

**Fig. S4.**  
**The 3 performance objectives that formulations are optimized for.** Performance objectives are parsed from stress-strain data that is resultant of the compression testing.

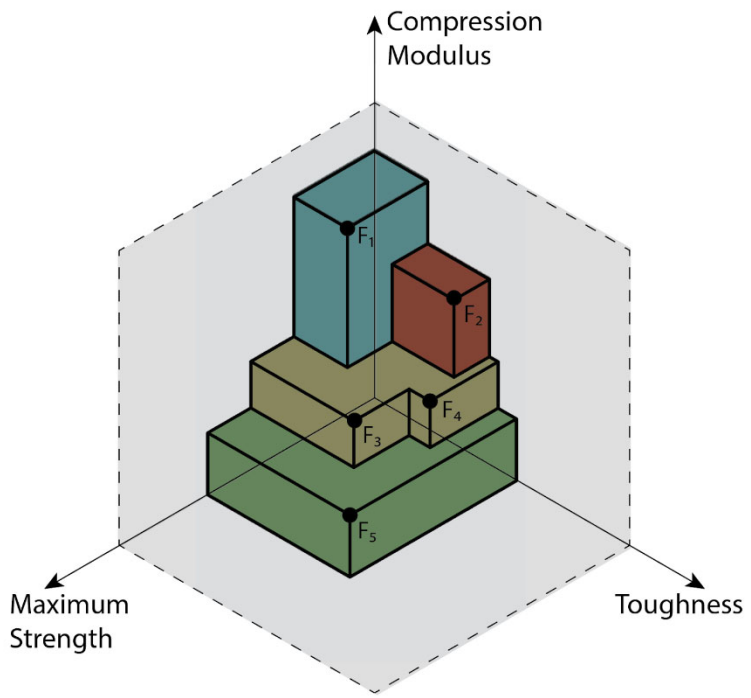

**Fig. S5. Hypervolume calculation.** A hypervolume that is calculated on Pareto optimal points  $F_1$ ,  $F_2$ ,  $F_3$ ,  $F_4$ , and  $F_5$ , with an origin as a reference point.

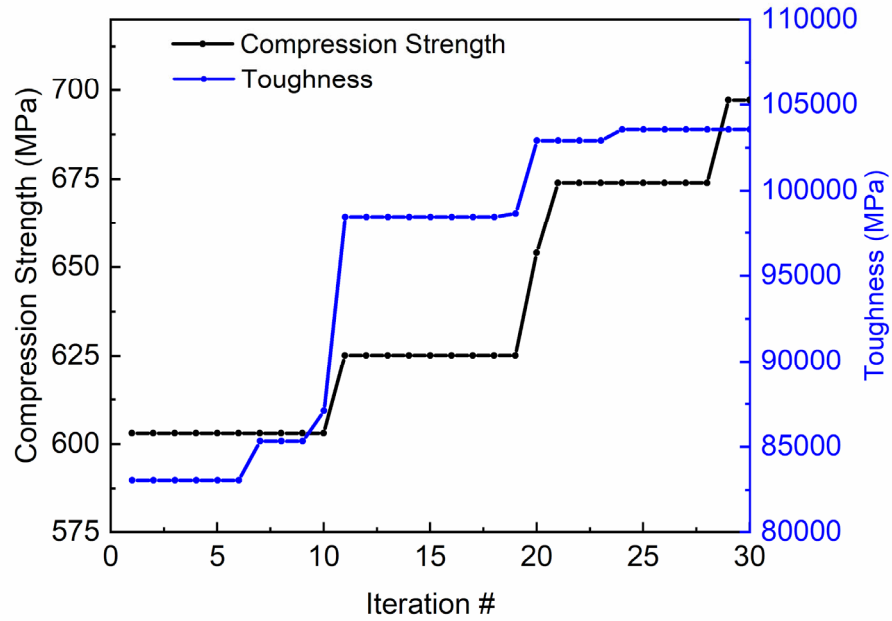

**Fig. S6.**

**Performance objective improvement.** The influence of iteration number on the maximum attained compression strength and toughness over the entire optimization process. The maximum attained compression modulus did not increase over the entire optimization process (not shown in this figure).



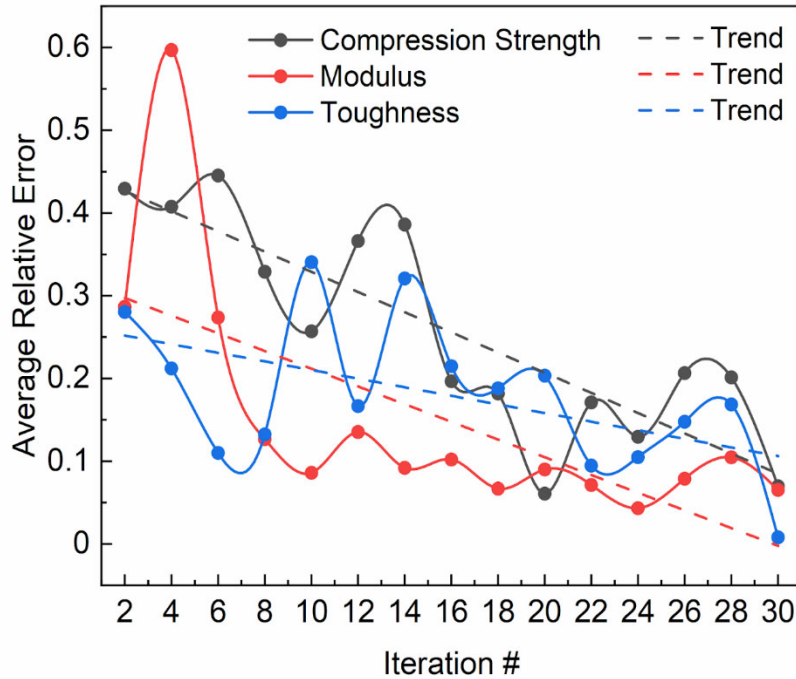

**Fig. S7.**

**Gaussian process performance evolution.** The influence of iteration number on the relative model prediction error averaged over four samples in each iteration. The relative average error is calculated by  $(\text{predicted performance} - \text{experimental performance}) / (\text{experimental performance})$  for every formulation in each iteration and then leveraging them. As indicated by the trendlines, with the number of iterations increases and more data points are added to the model, the model prediction accuracy increases. In circumstances where only sparse data is available for model training, the model's prediction capability is relatively low and is not recommended for prediction; however, they are still helpful for optimization problems.

**Table S1.**

The average duration and standard deviation of each time processing step within the sample fabrication pipeline.

|                    | <b>Dispensing</b> | <b>Mixing</b> | <b>Syringe Loading</b> | <b>3D Printing</b> | <b>Post-Processing</b> | <b>Testing</b> | <b>Total</b>  |
|--------------------|-------------------|---------------|------------------------|--------------------|------------------------|----------------|---------------|
| Average Time       | 157.7 s           | 64.7 s        | 45.7 s                 | 1975 s             | 4354 s                 | 199.7 s        | <b>6797 s</b> |
| Standard Deviation | 3 s               | 0.6 s         | 3.2 s                  | 190.9 s            | 13.54 s                | 30 s           | <b>241 s</b>  |

**Table S2.**

Formulations of the 6 primary inks (weight percentage).

| <b>Primary Formulation</b> | <b>Oligomer</b>                      | <b>Diluent</b>                          | <b>Photoinitiator</b>                                 | <b>Surfactant</b> |
|----------------------------|--------------------------------------|-----------------------------------------|-------------------------------------------------------|-------------------|
| A                          | 59% Modified Urethane Di-Acrylate    | 39.5% Acrylic Acid Amide                | 0.5% Bis(2,4,6-trimethylbenzoyl)-phenylphosphineoxide | 1% Tween-20       |
| B                          | 69% Aliphatic Urethane Di-Acrylate   | 30% Acrylic Acid Ester                  | 0.5% Bis(2,4,6-trimethylbenzoyl)-phenylphosphineoxide | 0.5% Tween-20     |
| C                          | 69% Aliphatic Urethane Hexa-Acrylate | 30% Acrylic Acid Ester                  | 0.5% Bis(2,4,6-trimethylbenzoyl)-phenylphosphineoxide | 0.5% Tween-20     |
| D                          | 69% Aliphatic Urethane Di-Acrylate   | 30% Polyoxyethyleneamine                | 0.5% Bis(2,4,6-trimethylbenzoyl)-phenylphosphineoxide | 0.5% Tween-20     |
| E                          | 59% Modified Urethane Di-Acrylate    | 40% Acrylic Acid EsterRahn Genomer 1121 | 0.5% Bis(2,4,6-trimethylbenzoyl)-phenylphosphineoxide | 0.5% Tween-20     |
| F                          | 89.5% Urethane Dimethacrylate        | 10% Acrylic Acid Ester                  | 0.5% Bis(2,4,6-trimethylbenzoyl)-phenylphosphineoxide |                   |

**Table S3.**

Viscosity of the 6 primary inks measured with a rotary viscometer (Brookfield, Middleboro, MA, USA).

| <b>Primary Formulation</b> | <b>Viscosity (cP)</b> | <b>Rotational Speed (rpm)</b> |
|----------------------------|-----------------------|-------------------------------|
| A                          | 640                   | 1                             |
| B                          | 180                   | 1                             |
| C                          | 60                    | 5                             |
| D                          | 60                    | 5                             |
| E                          | 610                   | 1                             |
| F                          | 160                   | 5                             |

**Table S4.**

The composition and performance of the 150 samples that were tested during the optimization process. Formulations with no mechanical performance values could not be tested due to being too brittle to manufacture or test. The formulations are listed in order of when each sample was tested during the optimization process.

| Mechanical Performance     |                           |                 | Formulation |         |         |         |         |         |
|----------------------------|---------------------------|-----------------|-------------|---------|---------|---------|---------|---------|
| Compression Strength [MPa] | Compression Modulus [MPa] | Toughness [GPa] | A [wt%]     | B [wt%] | C [wt%] | D [wt%] | E [wt%] | F [wt%] |
| 455                        | 1.37                      | 68113           | 0           | 18      | 21      | 28      | 20      | 13      |
| 280                        | 2.11                      | 51731           | 0           | 2       | 38      | 4       | 29      | 27      |
| 470                        | 1.76                      | 77877           | 19          | 30      | 10      | 6       | 7       | 28      |
| 440                        | 1.96                      | 76655           | 8           | 16      | 14      | 4       | 19      | 39      |
| 366                        | 1.23                      | 62118           | 34          | 6       | 23      | 16      | 19      | 2       |
| 411                        | 1.12                      | 66050           | 14          | 10      | 7       | 20      | 27      | 22      |
| 136                        | 0.90                      | 22269           | 7           | 7       | 32      | 21      | 3       | 30      |
| 369                        | 1.31                      | 61644           | 2           | 1       | 27      | 13      | 49      | 8       |
| 534                        | 0.90                      | 68785           | 9           | 32      | 3       | 13      | 37      | 6       |
| 443                        | 0.73                      | 59416           | 8           | 21      | 2       | 0       | 61      | 8       |
| 507                        | 0.98                      | 66651           | 9           | 32      | 4       | 21      | 17      | 17      |
| 444                        | 1.12                      | 65323           | 14          | 30      | 7       | 10      | 25      | 14      |
| 490                        | 1.33                      | 72484           | 4           | 17      | 7       | 22      | 24      | 26      |
| 359                        | 1.73                      | 60280           | 17          | 15      | 28      | 29      | 0       | 11      |

|     |      |       |     |     |    |     |    |     |
|-----|------|-------|-----|-----|----|-----|----|-----|
| 485 | 0.89 | 66192 | 10  | 14  | 14 | 26  | 27 | 9   |
| 229 | 0.73 | 49588 | 100 | 0   | 0  | 0   | 0  | 0   |
| 436 | 1.17 | 60782 | 0   | 100 | 0  | 0   | 0  | 0   |
| 368 | 0.04 | 29840 | 0   | 0   | 0  | 100 | 0  | 0   |
| 558 | 1.01 | 72324 | 60  | 40  | 0  | 0   | 0  | 0   |
| 545 | 1.01 | 76481 | 55  | 45  | 0  | 0   | 0  | 0   |
| 596 | 1.03 | 80252 | 50  | 50  | 0  | 0   | 0  | 0   |
| 578 | 1.03 | 78300 | 45  | 55  | 0  | 0   | 0  | 0   |
| 603 | 1.05 | 79495 | 40  | 60  | 0  | 0   | 0  | 0   |
| 536 | 1.34 | 83057 | 27  | 44  | 9  | 4   | 8  | 8   |
| 381 | 1.58 | 63939 | 4   | 19  | 36 | 20  | 12 | 9   |
| 488 | 1.69 | 74453 | 0   | 59  | 0  | 8   | 8  | 25  |
| 492 | 2.04 | 77476 | 0   | 39  | 13 | 7   | 3  | 38  |
| 483 | 1.70 | 74332 | 1   | 51  | 0  | 10  | 2  | 36  |
| 461 | 1.53 | 68684 | 1   | 62  | 1  | 3   | 10 | 23  |
| 429 | 1.96 | 73565 | 6   | 30  | 41 | 1   | 1  | 21  |
| 420 | 1.75 | 70958 | 8   | 32  | 50 | 7   | 2  | 1   |
| 186 | 2.00 | 39188 | 15  | 28  | 25 | 1   | 6  | 25  |
| 308 | 2.93 | 68674 | 0   | 0   | 0  | 0   | 0  | 100 |

|     |      |       |    |    |    |    |     |    |
|-----|------|-------|----|----|----|----|-----|----|
| 248 | 0.34 | 41639 | 0  | 0  | 0  | 0  | 100 | 0  |
| 330 | 1.61 | 58955 | 2  | 11 | 0  | 50 | 3   | 34 |
| 261 | 2.54 | 54114 | 1  | 19 | 0  | 0  | 0   | 80 |
| 374 | 2.13 | 72005 | 1  | 39 | 0  | 2  | 1   | 57 |
| 442 | 1.64 | 73645 | 18 | 12 | 0  | 36 | 0   | 34 |
| 326 | 2.26 | 65493 | 1  | 0  | 13 | 25 | 0   | 61 |
| 407 | 1.71 | 79299 | 32 | 0  | 12 | 1  | 0   | 55 |
| 281 | 2.09 | 55835 | 1  | 15 | 10 | 21 | 0   | 53 |
| 345 | 2.26 | 66935 | 1  | 0  | 15 | 25 | 0   | 59 |
| 338 | 1.71 | 65225 | 15 | 45 | 4  | 3  | 1   | 32 |
| 381 | 0.61 | 47362 | 5  | 32 | 0  | 57 | 6   | 0  |
| 424 | 1.31 | 68133 | 31 | 52 | 0  | 8  | 2   | 7  |
| 413 | 0.72 | 59056 | 15 | 4  | 13 | 67 | 1   | 0  |
| 390 | 1.30 | 60316 | 0  | 21 | 20 | 58 | 1   | 0  |
| 244 | 1.58 | 43427 | 0  | 1  | 28 | 67 | 1   | 3  |
| -   | -    | -     | 0  | 0  | 4  | 0  | 0   | 96 |
| 419 | 1.12 | 61445 | 1  | 28 | 11 | 46 | 11  | 3  |
| 463 | 1.47 | 81857 | 49 | 6  | 0  | 14 | 2   | 29 |
| -   | -    | -     | 10 | 2  | 5  | 0  | 3   | 80 |

|     |      |       |    |    |    |    |    |    |
|-----|------|-------|----|----|----|----|----|----|
| 260 | 1.94 | 59061 | 14 | 0  | 7  | 1  | 1  | 77 |
| 461 | 1.57 | 75813 | 3  | 58 | 18 | 4  | 10 | 7  |
| 435 | 1.97 | 80546 | 0  | 31 | 1  | 2  | 15 | 51 |
| 411 | 1.71 | 85333 | 25 | 1  | 1  | 4  | 13 | 56 |
| 594 | 1.08 | 82485 | 29 | 45 | 6  | 8  | 12 | 0  |
| 332 | 1.23 | 62332 | 2  | 1  | 16 | 1  | 50 | 30 |
| 462 | 1.57 | 80821 | 2  | 24 | 0  | 3  | 26 | 45 |
| 386 | 1.91 | 76224 | 0  | 1  | 0  | 1  | 27 | 71 |
| 459 | 1.39 | 78607 | 9  | 2  | 0  | 6  | 40 | 43 |
| 386 | 1.80 | 73308 | 0  | 16 | 0  | 0  | 25 | 59 |
| 421 | 1.90 | 83070 | 32 | 9  | 2  | 1  | 1  | 55 |
| 256 | 2.25 | 53258 | 0  | 8  | 13 | 0  | 11 | 68 |
| 344 | 1.90 | 72698 | 39 | 1  | 3  | 0  | 0  | 57 |
| 317 | 1.92 | 66141 | 26 | 18 | 2  | 1  | 1  | 52 |
| 406 | 1.94 | 81223 | 20 | 16 | 0  | 0  | 0  | 64 |
| 579 | 1.04 | 87101 | 51 | 31 | 7  | 1  | 1  | 9  |
| 297 | 2.27 | 61772 | 14 | 17 | 2  | 0  | 0  | 67 |
| 230 | 1.78 | 53154 | 0  | 3  | 2  | 21 | 32 | 42 |
| 296 | 0.89 | 60049 | 57 | 0  | 11 | 1  | 10 | 21 |



|     |      |       |    |    |    |   |    |    |
|-----|------|-------|----|----|----|---|----|----|
| 625 | 1.13 | 94709 | 51 | 25 | 10 | 2 | 12 | 0  |
| 559 | 1.56 | 98461 | 51 | 1  | 7  | 2 | 11 | 28 |
| 350 | 2.67 | 74202 | 0  | 0  | 0  | 2 | 0  | 98 |
| 484 | 1.58 | 91455 | 60 | 0  | 3  | 0 | 2  | 35 |
| 334 | 1.83 | 67470 | 34 | 0  | 11 | 1 | 6  | 48 |
| 401 | 1.52 | 75082 | 44 | 11 | 11 | 0 | 6  | 28 |
| 340 | 1.17 | 68371 | 66 | 0  | 8  | 0 | 0  | 26 |
| 620 | 1.32 | 92325 | 37 | 47 | 10 | 0 | 6  | 0  |
| 457 | 1.03 | 73400 | 44 | 30 | 9  | 4 | 13 | 0  |
| 527 | 1.21 | 80673 | 27 | 61 | 12 | 0 | 0  | 0  |
| 182 | 2.15 | 33836 | 1  | 0  | 0  | 2 | 8  | 89 |
| -   | -    | -     | 30 | 2  | 3  | 1 | 19 | 44 |
| 299 | 1.91 | 62780 | 21 | 11 | 6  | 0 | 14 | 48 |
| -   | -    | -     | 30 | 5  | 3  | 0 | 19 | 43 |
| 342 | 1.81 | 73191 | 52 | 1  | 1  | 0 | 0  | 46 |
| 293 | 2.10 | 64377 | 0  | 38 | 1  | 0 | 0  | 61 |
| 284 | 2.03 | 60696 | 0  | 31 | 1  | 0 | 0  | 68 |
| 419 | 1.51 | 75788 | 32 | 34 | 2  | 0 | 1  | 31 |
| 273 | 1.95 | 60035 | 1  | 41 | 0  | 0 | 1  | 57 |

|     |      |        |    |    |    |    |    |    |
|-----|------|--------|----|----|----|----|----|----|
| 325 | 2.00 | 65022  | 0  | 41 | 0  | 13 | 0  | 46 |
| 361 | 2.09 | 69396  | 0  | 18 | 0  | 26 | 1  | 55 |
| 310 | 1.92 | 61302  | 4  | 45 | 0  | 7  | 1  | 43 |
| 321 | 2.02 | 62666  | 0  | 25 | 0  | 25 | 0  | 50 |
| 408 | 1.58 | 76318  | 36 | 20 | 2  | 8  | 0  | 34 |
| 398 | 1.91 | 74553  | 21 | 0  | 0  | 33 | 1  | 45 |
| 438 | 1.81 | 79745  | 25 | 0  | 0  | 31 | 1  | 43 |
| 403 | 1.88 | 75747  | 19 | 0  | 0  | 32 | 1  | 48 |
| 368 | 1.77 | 65606  | 0  | 63 | 10 | 0  | 0  | 27 |
| 393 | 1.89 | 69484  | 0  | 66 | 9  | 0  | 0  | 25 |
| 317 | 2.20 | 63762  | 0  | 33 | 11 | 1  | 0  | 55 |
| 356 | 1.80 | 64450  | 0  | 68 | 9  | 0  | 1  | 22 |
| 438 | 2.12 | 87349  | 35 | 0  | 0  | 1  | 0  | 64 |
| 335 | 2.04 | 65124  | 1  | 0  | 0  | 36 | 0  | 63 |
| 514 | 1.54 | 93644  | 48 | 0  | 1  | 0  | 12 | 39 |
| 526 | 1.92 | 98664  | 39 | 0  | 0  | 2  | 1  | 58 |
| 555 | 1.41 | 91162  | 40 | 17 | 0  | 0  | 12 | 31 |
| 654 | 1.12 | 96006  | 44 | 27 | 0  | 0  | 17 | 12 |
| 613 | 1.35 | 102904 | 34 | 14 | 0  | 0  | 13 | 39 |

|     |      |        |    |    |   |    |    |    |
|-----|------|--------|----|----|---|----|----|----|
| 575 | 1.48 | 99855  | 33 | 12 | 0 | 0  | 13 | 42 |
| 596 | 1.59 | 97568  | 39 | 0  | 0 | 0  | 22 | 39 |
| 674 | 1.31 | 96610  | 39 | 31 | 0 | 0  | 22 | 8  |
| 571 | 1.57 | 97058  | 41 | 0  | 0 | 0  | 25 | 34 |
| 454 | 1.86 | 85375  | 35 | 0  | 0 | 0  | 20 | 45 |
| 512 | 1.78 | 93176  | 33 | 0  | 0 | 0  | 21 | 46 |
| 385 | 1.85 | 77998  | 31 | 0  | 0 | 0  | 20 | 49 |
| 536 | 1.71 | 96498  | 35 | 0  | 0 | 0  | 21 | 44 |
| 290 | 1.97 | 66399  | 20 | 0  | 0 | 0  | 1  | 79 |
| 597 | 1.00 | 92485  | 50 | 0  | 0 | 0  | 30 | 20 |
| 391 | 0.89 | 64361  | 53 | 6  | 0 | 0  | 32 | 9  |
| 430 | 0.80 | 68900  | 53 | 0  | 0 | 0  | 33 | 14 |
| 397 | 1.08 | 76450  | 42 | 0  | 0 | 0  | 27 | 31 |
| 413 | 1.73 | 80203  | 42 | 1  | 0 | 0  | 14 | 43 |
| 512 | 1.67 | 92117  | 39 | 0  | 0 | 0  | 13 | 48 |
| 627 | 1.59 | 103559 | 44 | 0  | 0 | 5  | 13 | 38 |
| 459 | 1.88 | 85164  | 28 | 0  | 0 | 11 | 8  | 53 |
| 489 | 1.87 | 89171  | 42 | 12 | 0 | 0  | 6  | 40 |
| 523 | 1.82 | 92589  | 42 | 11 | 0 | 1  | 7  | 39 |

|     |      |        |    |    |   |   |    |    |
|-----|------|--------|----|----|---|---|----|----|
| 484 | 2.01 | 89597  | 42 | 11 | 0 | 0 | 4  | 43 |
| 507 | 1.87 | 91083  | 45 | 8  | 0 | 0 | 5  | 42 |
| 415 | 1.44 | 76846  | 41 | 14 | 0 | 0 | 7  | 38 |
| 498 | 1.59 | 86258  | 41 | 12 | 0 | 0 | 6  | 41 |
| 387 | 1.52 | 74536  | 42 | 16 | 0 | 0 | 7  | 35 |
| 605 | 1.70 | 100895 | 40 | 13 | 0 | 0 | 8  | 39 |
| 330 | 2.39 | 72121  | 25 | 0  | 0 | 0 | 0  | 75 |
| 431 | 2.06 | 85777  | 27 | 0  | 0 | 0 | 0  | 73 |
| 379 | 1.24 | 79506  | 23 | 0  | 0 | 0 | 0  | 77 |
| -   | -    | -      | 24 | 0  | 0 | 0 | 0  | 76 |
| -   | -    | -      | 32 | 0  | 0 | 0 | 9  | 59 |
| 374 | 1.76 | 76874  | 27 | 0  | 0 | 0 | 14 | 59 |
| 305 | 1.89 | 67571  | 30 | 0  | 0 | 0 | 9  | 61 |
| 474 | 1.64 | 89097  | 32 | 1  | 0 | 0 | 9  | 58 |
| 697 | 1.10 | 95259  | 37 | 37 | 0 | 0 | 19 | 7  |
| 632 | 1.02 | 84624  | 38 | 41 | 0 | 1 | 19 | 1  |
| -   | -    | -      | 39 | 39 | 0 | 0 | 22 | 0  |
| 558 | 1.15 | 81235  | 34 | 36 | 0 | 0 | 20 | 10 |
| 500 | 1.68 | 86776  | 39 | 23 | 0 | 0 | 0  | 38 |

---

|     |      |       |    |    |   |   |   |    |
|-----|------|-------|----|----|---|---|---|----|
| 502 | 1.65 | 86185 | 37 | 22 | 0 | 1 | 0 | 40 |
| 498 | 1.68 | 87186 | 41 | 21 | 0 | 1 | 0 | 37 |
| 465 | 1.95 | 85124 | 32 | 19 | 0 | 0 | 0 | 49 |

---
